# Supplementary material for: Co-Designing and Refining a Home-Based Exercise Programme for Adults Living with Overweight and Obesity: Insight from People with Lived Experience
Source: MDPI journal article supplement (doi:10.3390/obesities3020011), 2023-04-01
Supplement: s1 [file s1]

Archive with 1 entries (1 files):
- obesities-2283600-supplementary.pdf
